# Supplementary material
Source: Research Square preprint supplement (doi:10.21203/rs.3.rs-8948577/v1)
Supplement: Supplementary file 1 [file 0a2e967829ec23fff56923ad.docx]

**[supplementary material](https://www.sciencedirect.com/journal/journal-of-cardiovascular-magnetic-resonance/publish/guide-for-authors" \l "toc-42)**

**Table Characteristics of CMR sequences**

| **Parameters** | **Cine** | **LGE** | **T1 mapping** | **T2 mapping** |
| --- | --- | --- | --- | --- |
| repetition time, ms | 3.2 | 6.1 | 2.1 | 1154 |
| echo time, ms | 1.62 | 3.0 | 0.94 | shortest |
| Flip angle | 45。 | 25。 | 20。 | 90。 |
| Field of view, mm | 350X350X96 | 350X350X80 | 300X300X46 | 300X300X46 |
| matrix size | 196X164X12 | 220X159 | 144X142 | 152X148 |
| Slice thickness, mm | 10 | 10 | 8 | 8 |

CMR: cardiovascular magnetic resonance; LGE: late gadolinium enhancement.
